# Supplementary material for: The Architectural Layout of Long-Term Care Units: Relationships between Support for Residents’ Well-Being and for Caregivers’ Burnout and Resilience
Source: MDPI journal article supplement (doi:10.3390/ijerph21050575), 2024-04-30
Supplement: s1 [file s1]

Supplementary Table A1 – *The Psycho-Spatial Evaluation Tool (PSET) - The Twenty-Eight Variables and Measurement Methods*

| Variables                    |                                                                                                                                         |                        | Unit | Type of correlation (negative; positive) |             |                   |                         |           |
|------------------------------|-----------------------------------------------------------------------------------------------------------------------------------------|------------------------|------|------------------------------------------|-------------|-------------------|-------------------------|-----------|
|                              |                                                                                                                                         |                        |      | Physical well-being                      |             | Social well-being |                         |           |
|                              |                                                                                                                                         |                        |      | Comfort                                  | Stimulation | Status            | Behavioral confirmation | Affection |
| Measured from the plan       | Number of dedicated public activity rooms (day room or dining rooms)                                                                    | Numerical              | 0    | 1                                        | 0           | 0                 | 1                       |           |
|                              | Number of internal places that can be used for social interaction                                                                       | Numerical              | 0    | 0                                        | 0           | 0                 | 1                       |           |
|                              | Number of external places that can be used for social interaction                                                                       | Numerical              | 0    | 0                                        | 0           | 0                 | 1                       |           |
|                              | Perceived area of dedicated public activity rooms per person                                                                            | M <sup>2</sup> /person | 0    | -1                                       | 0           | 0                 | 0                       |           |
|                              | Total unit area- per person                                                                                                             | M <sup>2</sup> /person | 1    | 0                                        | 0           | 0                 | 0                       |           |
|                              | Added distance from bedrooms to dedicated public activity room per bedroom                                                              | M/bedroom              | 1    | -1                                       | 1           | 0                 | 0                       |           |
|                              | Added distance from bedrooms to staff base per bedroom                                                                                  | M/bedroom              | -1   | 0                                        | 0           | -1                | -1                      |           |
|                              | Maximum distance from the staff base to the dedicated public activity areas                                                             | Meters                 | 0    | 0                                        | 0           | 0                 | -1                      |           |
|                              | Added distance from the staff base to all support rooms                                                                                 | Meters                 | 0    | 0                                        | 0           | -1                | -1                      |           |
|                              | Added distance from the bedrooms to the kitchen per room                                                                                | M/bedroom              | 1    | -1                                       | 0           | 0                 | 0                       |           |
|                              | Distance between room with malodor and the central corridor                                                                             | Meters                 | 1    | 0                                        | 0           | 0                 | 0                       |           |
|                              | Minimum distance between room with malodors and main entrance                                                                           | Meters                 | 0    | 0                                        | 0           | 0                 | 1                       |           |
|                              | The longest visual distance in the unit                                                                                                 | Meters                 | 0    | -1                                       | 1           | 0                 | 0                       |           |
|                              | Percentage of parallel bedroom doors                                                                                                    | Meters                 | -1   | 0                                        | 0           | 0                 | 0                       |           |
|                              | The type of staff base (protrusive, semi-protrusive, obtrusive)                                                                         | Numerical              | 0    | 1                                        | 0           | 1                 | 0                       |           |
|                              | Penetration experience - the designation of the room located on the route from the main entrance to the dedicated public activity rooms | Numerical              | 0    | 0                                        | 0           | 0                 | -1                      |           |
|                              | Penetration experience - the designation of the room located on the route from the main entrance to the staff base                      | Numerical              | 0    | 0                                        | 0           | 0                 | -1                      |           |
| Calculated with Space Syntax | Integration - of dedicated public activity rooms                                                                                        | Numerical              | 0    | 1                                        | 0           | 1                 | 0                       |           |
|                              | Integration - of the staff base                                                                                                         | Numerical              | 0    | 0                                        | 0           | 1                 | 1                       |           |
|                              | Choice - in dedicated public activity rooms                                                                                             | Numerical              | 0    | -1                                       | 0           | 0                 | 0                       |           |
|                              | Choice - in corridors or areas adjacent to the dedicated public activity rooms                                                          | Numerical              | 0    | -1                                       | 0           | 0                 | 0                       |           |
|                              | Intelligibility - levels of orientation                                                                                                 | Numerical              | 0    | 1                                        | 0           | 0                 | 0                       |           |
|                              | Visibility - the visibility from and to the staff base                                                                                  | Numerical              | 1    | 1                                        | 0           | 1                 | 1                       |           |
|                              | Visibility - from and to the staff base to the dedicated public activity rooms                                                          | Numerical              | 0    | 0                                        | 0           | 1                 | 0                       |           |
|                              | Visibility - the visibility from and to the dedicated public activity rooms                                                             | Numerical              | 0    | -1                                       | 0           | 0                 | 0                       |           |
|                              | Visibility - the visibility to and from the bedroom doors                                                                               | Numerical              | -1   | 0                                        | 1           | 0                 | 0                       |           |
|                              | Visibility - to and from the main entrance to the dedicated public activity rooms                                                       | Numerical              | 0    | 0                                        | 0           | 0                 | -1                      |           |
|                              | Visibility - to and from the main entrance to the bedrooms (percentage of the floor area)                                               | Numerical              | -1   | 0                                        | -1          | 0                 | 0                       |           |

M<sup>2</sup>/person = square meters per number of residents in the unit

M/bedroom = added distance (measured in meters) from bedroom door per number of bedrooms

Supplementary Table A2 - *Regression Coefficients for All Prediction Analyses*

| Type of unit | The unit caregivers' burnout and resilience indexes | The architectural layouts' level of support for the residents' five well-being needs |             |        |                         |           | # Architectural layout support for the residents' well-being needs(out of the 5 PSET variables) |        | # Architectural layout variables (out of the 28 PSET variables) |        | # Background data (out of 10 background variables) |        |
|--------------|-----------------------------------------------------|--------------------------------------------------------------------------------------|-------------|--------|-------------------------|-----------|-------------------------------------------------------------------------------------------------|--------|-----------------------------------------------------------------|--------|----------------------------------------------------|--------|
|              |                                                     | Comfort                                                                              | Stimulation | Status | Behavioral confirmation | Affection | P>0.05                                                                                          | P>0.01 | P>0.05                                                          | P>0.01 | P>0.05                                             | P>0.01 |
|              |                                                     |                                                                                      |             |        |                         |           |                                                                                                 |        |                                                                 |        |                                                    |        |
| SDU          | Burnout                                             | -                                                                                    |             | -      | -                       | -         | -                                                                                               | -      | -                                                               | -      | -                                                  | -      |
|              | Work environment.                                   | 0.04 (+)                                                                             | 0.04 (-)    | -      | -                       | -         | -                                                                                               | 2      | 6                                                               | 1      | 1                                                  | -      |
|              | Occupation                                          | -                                                                                    | -           | -      | -                       | -         | -                                                                                               | -      | 1                                                               |        |                                                    | -      |
|              | Workplace support                                   | -                                                                                    | -           | -      | 0.05 (-)                | -         | -                                                                                               | 1      | 7                                                               | 1      | 1                                                  | -      |
|              | Well-being (health)                                 | -                                                                                    | -           | -      | -                       | -         | -                                                                                               | -      | 1                                                               |        |                                                    | -      |
|              | Total survey results                                | -                                                                                    | -           | -      | -                       | -         | -                                                                                               | -      |                                                                 |        |                                                    | -      |
|              | Unit-caregiver-resident relationship                | -                                                                                    | -           | -      | -                       | -         | -                                                                                               | -      | 5                                                               | 1      | 1                                                  | -      |
|              | #Predictors                                         | 1                                                                                    | 1           |        | 1                       | 0         | 0                                                                                               | 3      | 20                                                              | 3      | 3                                                  | 0      |
| RNU          | Burnout                                             | -                                                                                    | -           | 0.02   | 0.01                    | -         |                                                                                                 | 2      | 5                                                               | 3      | 2                                                  | -      |
|              | Work environment.                                   | -                                                                                    | -           | 0.00   | 0.00                    | -         | 2                                                                                               | -      | 6                                                               | 2      | 1                                                  | -      |
|              | Occupation                                          | -                                                                                    | -           | 0.00   | 0.00                    | -         | 2                                                                                               | -      | 5                                                               | 2      | -                                                  | -      |
|              | Workplace support                                   | 0.02                                                                                 | -           | -      | 0.00                    | -         | 2                                                                                               | -      | 4                                                               | 13     | -                                                  | 1      |
|              | Well-being (health)                                 | -                                                                                    | -           | -      | 0.00                    | -         | -                                                                                               | 1      | 11                                                              | 9      | -                                                  | -      |
|              | Total survey results                                | -                                                                                    | -           | -      | 0.00                    | -         | -                                                                                               | 1      | 5                                                               | 12     | -                                                  | -      |
|              | Unit-caregiver-resident relationship                | -                                                                                    | -           | -      | -                       | -         | -                                                                                               | -      | 4                                                               | -      | 3                                                  | 1      |
|              | #Predictors                                         | 1                                                                                    | 0           | 3      | 6                       | 0         | 6                                                                                               | 4      | 40                                                              | 41     | 6                                                  | 2      |
